# Supplementary material for: Controlled synthesis of ultrathin ZnO nanowires using micellar gold nanoparticles as catalyst templates
Source: Royal Society of Chemistry journal article supplement (doi:10.1039/c3nr01938a), 2013-01-01
Supplement: c3nr01938a.pdf [file c3nr01938a.pdf]

## Supporting Information

### **Controlled Synthesis of Ultrathin ZnO Nanowires with Sub-10 nm Diameter using Micellar Gold Nanoparticles as Catalyst Template**

Hong Yin,<sup>\*,a</sup> Qiushi Wang,<sup>a</sup> Sebastian Geburt,<sup>b</sup> Steffen Milz,<sup>b</sup> Bart Ruttens,<sup>a,c</sup> Giedrius Degutis,<sup>a</sup> Jan D'Haen,<sup>a,c</sup> Lianchen Shan,<sup>a</sup> Sathya Punniyakoti,<sup>a</sup> Marc D'Olieslaeger,<sup>a,c</sup> Patrick Wagner,<sup>a,c</sup> Carsten Ronning,<sup>b</sup> and Hans-Gerd Boyen<sup>a,c</sup>

<sup>a</sup>Institute for Materials Research (IMO-IMOMECE), Hasselt University, Wetenschapspark 1, B-3590, Diepenbeek, Belgium. \* Email: hong.yin@uhasselt.be

<sup>b</sup>Institute for Solid State Physics, Friedrich-Schiller-University Jena, Jena, D-07743, Germany.

<sup>c</sup>IMEC iwz, IMOMECE, Hasselt University, Wetenschapspark 1, B-3590, Diepenbeek, Belgium.

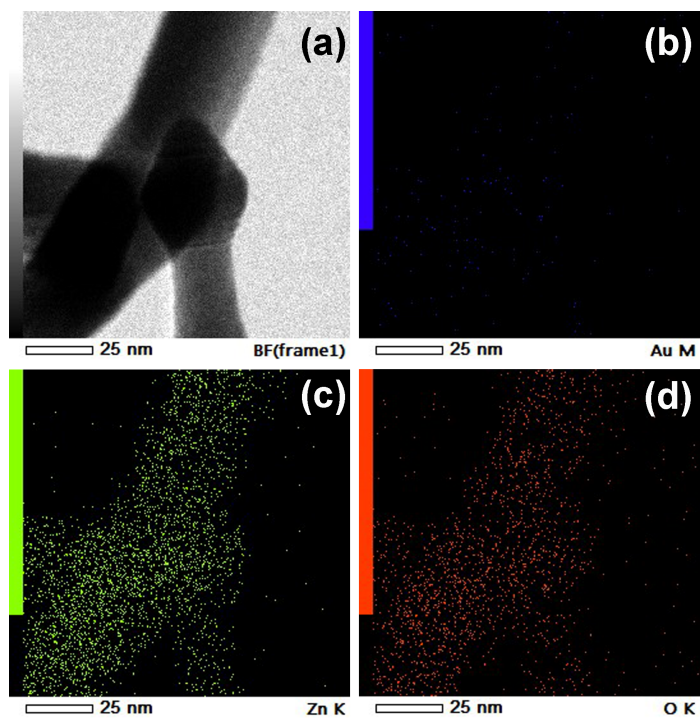

Figure S1 (a) A TEM image of an individual nanowire with a capped tip; (b), (c) and (d) shows the STEM elemental mapping (Au, Zn and O) done on this nanowire respectively.

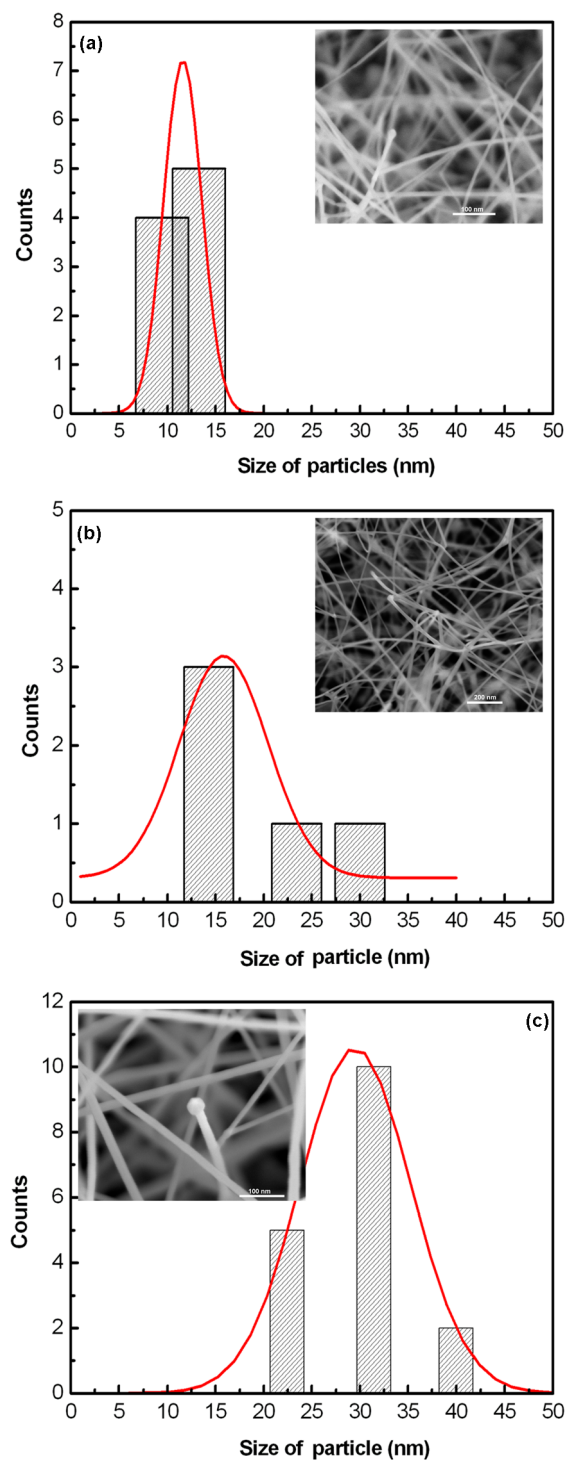

Figure S2. SEM pictures and corresponding size distribution of particles after wire growth at the tip end with the average size of  $11.6 \pm 2$  nm (a),  $17.7 \pm 3$  nm (b) and  $30 \pm 6$  nm (c) for the nanowires with average diameter of 6 nm, 10 nm and 16 nm, respectively.

Table S1. Average size of starting Au nanoparticles, as-obtained ZnO nanowires and particles after wire growth at the wire tip.

|                                     |               |               |               |
|-------------------------------------|---------------|---------------|---------------|
| Size of starting Au NPs (nm)        | $3.1 \pm 0.4$ | $6.5 \pm 0.6$ | $9.0 \pm 0.8$ |
| Diameter of obtained ZnO NWs (nm)   | $6 \pm 1.8$   | $10 \pm 3$    | $16 \pm 4.5$  |
| Size of particles after growth (nm) | $11.6 \pm 2$  | $17.7 \pm 3$  | $32 \pm 6$    |
